# Supplementary material
Source: ML conference proceedings conference paper supplement (https://proceedings.mlr.press/v70/winner17a.html)
Supplement: Supplementary file [file winner17a-supp.pdf]

## A. Supplementary Material

### A.1. Additional Details for Proof of Theorem 1

We have assumed that all paths from  $v_i$  to  $v_\ell$  go through  $v_j$ , and we wish to show that there exist functions  $\tilde{F}$  and  $\tilde{H}$  such that

$$\begin{aligned} v_j &= F(v_i) := \tilde{F}(v_i, v_A) \\ v_\ell &= H(v_j) := \tilde{H}(v_j, v_B) \end{aligned}$$

and all nodes in  $v_A$  and  $v_B$  are either not reachable from  $v_i$  or have no path to  $v_\ell$ . Note that if a variable  $v_k$  is not reachable from  $v_i$ , then the scalar value  $v_\ell$  may still depend on  $v_k$ , but the derivatives  $\frac{d^q v_\ell}{dv_i^q}$  do not depend on  $v_k$ , so it is safe to treat  $v_k$  as a fixed constant relative to the dual number  $\langle v_\ell, dv_i \rangle_q$ . If  $v_k$  has no path to  $v_\ell$ , neither  $v_\ell$  nor the derivatives  $\frac{d^q v_\ell}{dv_i^q}$  depend on  $v_k$ .

The construction of  $\tilde{F}$  is easy:

$$\tilde{F}(v_i, v_A) := f_{ij}(v_i, v_{0:i-1})$$

The nodes  $v_{0:i-1}$  precede  $v_i$  in the topological ordering, and hence have no path from  $i$ .

To construct  $\tilde{H}$ , we reason about the partial computation  $f_{j\ell}(v_{0:\ell})$  from  $v_j$  to  $v_\ell$ . Recall that this is defined recursively starting with  $\varphi_\ell(v_k)_{k < \ell}$ , and terminating whenever a variable  $v_p$  is reached for  $p \leq j$ . Consider any such variable  $v_p$  that is reached by the calculation. Then  $v_p$  must satisfy  $p < q$  for  $q > j$  (otherwise the recursion would not reach  $v_p$ ), and, furthermore, there must be a path from  $v_q$  to  $v_\ell$  (otherwise the recursion does not reach  $v_q$ ). In other words, there is a path  $v_p, v_q, \dots, v_\ell$  for  $q > j$ . However, this implies that  $v_p$  is *not* reachable from  $v_i$ , otherwise we would contradict the assumption that all paths from  $v_p$  to  $v_\ell$  go through  $v_j$ . Therefore, if we consider the subset of variables  $v_B \subseteq v_{0:j-1}$  on which  $f_{j\ell}$  depends, none of these variables is reachable from  $v_i$ . Therefore we can write:

$$\tilde{H}(v_j, v_B) = f_{j\ell}(v_j, v_B)$$

where we omit from  $f_{j\ell}$  the arguments on which it does not depend. This completes the argument.

### A.2. Additional Parameter Estimation Experiments

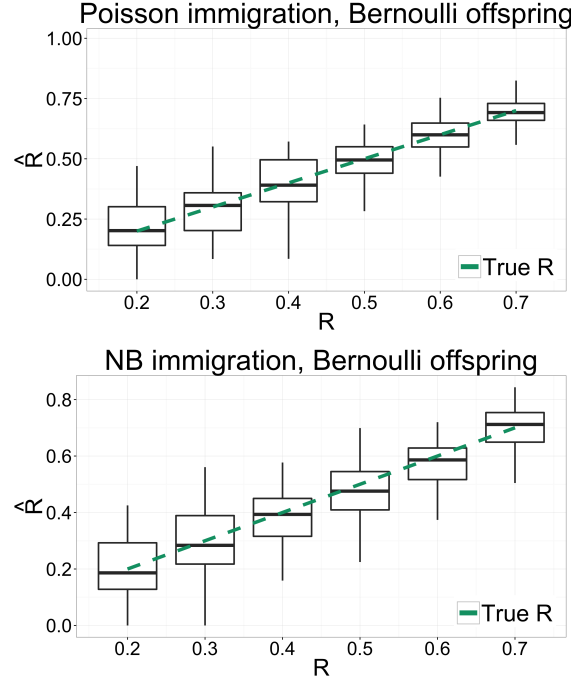

Figure 5. Estimates of  $R$  for two additional models. Titles indicate immigration and offspring distribution. 50 trials summarized as box plot for each model, parameter combination.
